# Supplementary material
Source: PubMed Central journal article supplement (PMC8417184)
Supplement: 13167_2021_247_MOESM1_ESM.pdf [file 13167_2021_247_MOESM1_ESM.pdf]

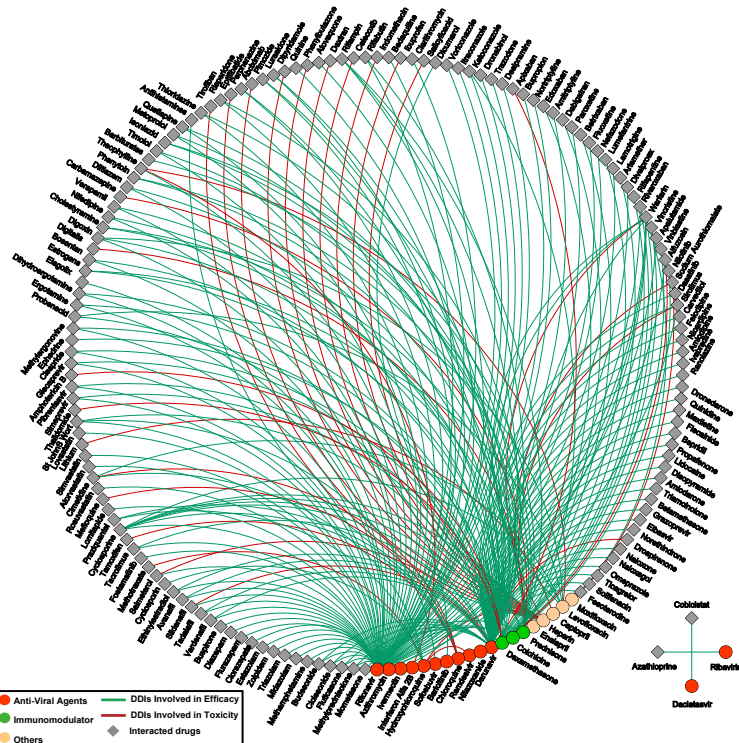

- Anti-Viral Agents
- DDIs Involved in Efficacy
- Immunomodulator
- DDIs Involved in Toxicity
- ◆ Interacted drugs
- Others

- ◆ Cobicistat
- Azathioprine
- Dacilevir
- Ribavirin
