# Supplementary material
Source: PubMed Central journal article supplement (PMC8417184)

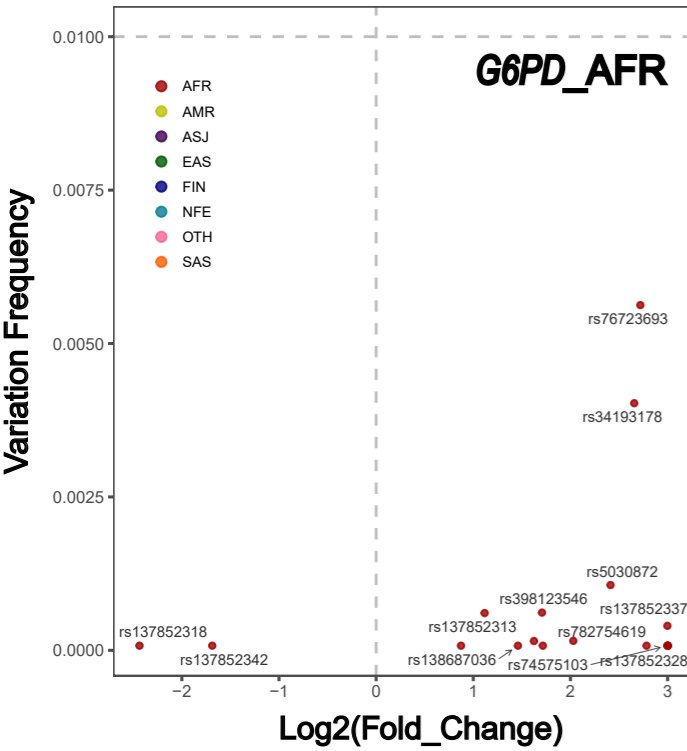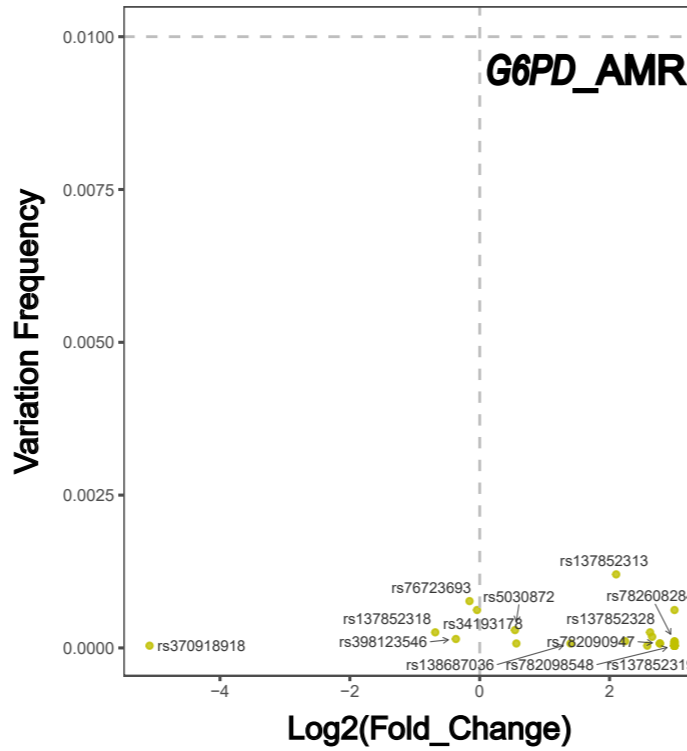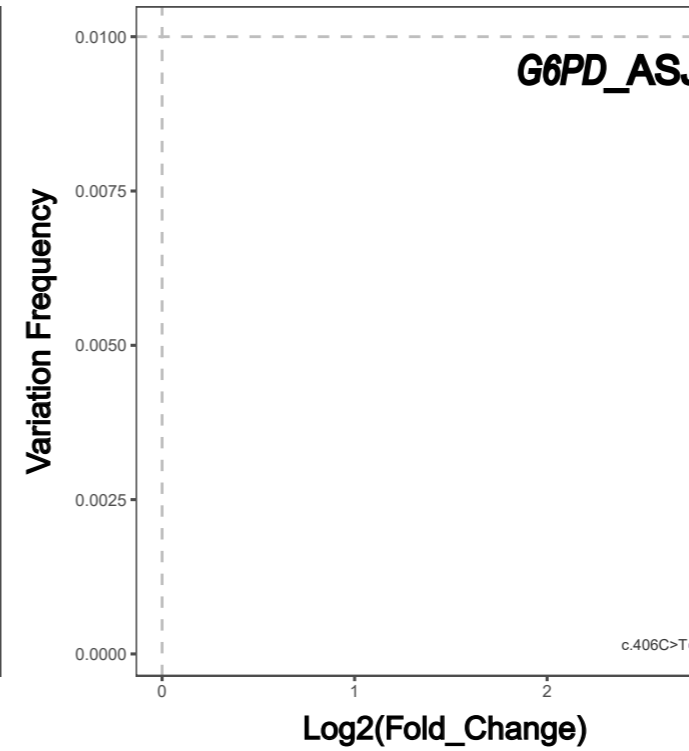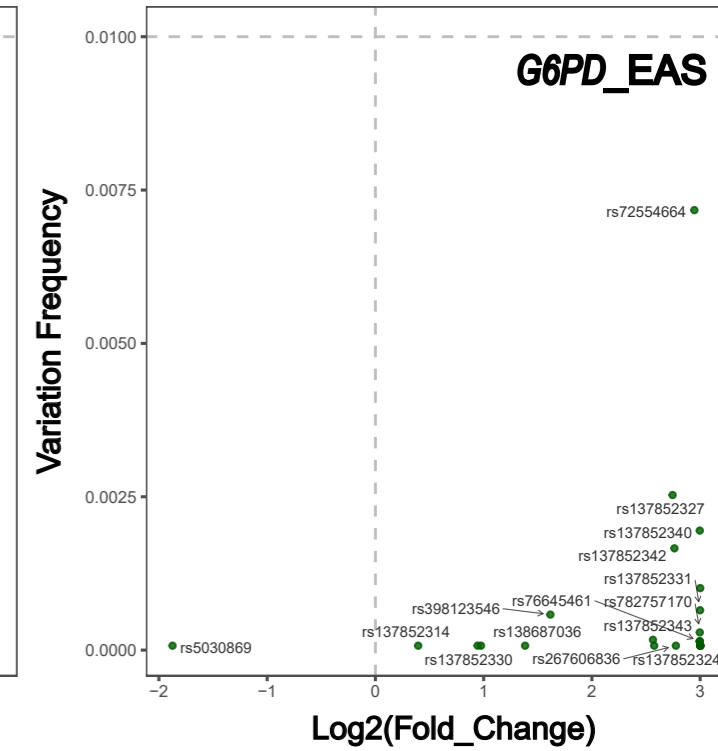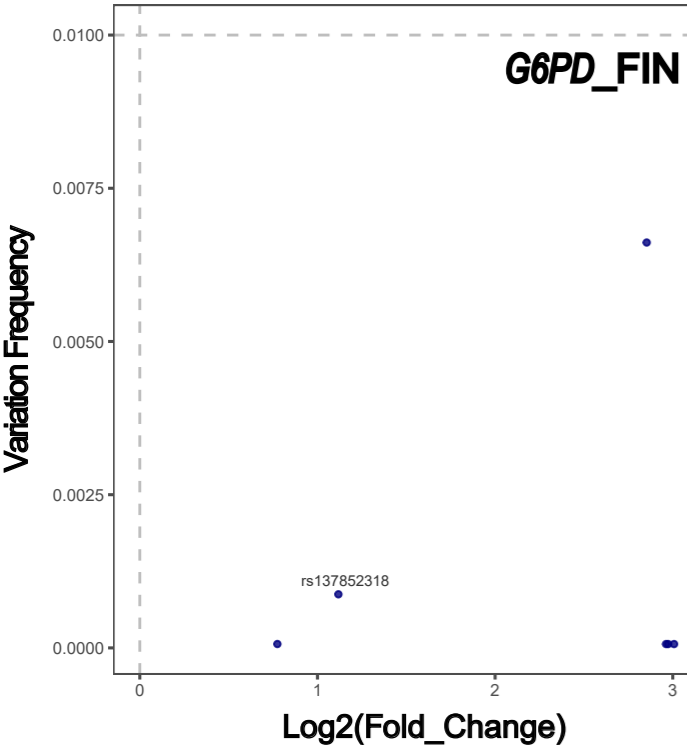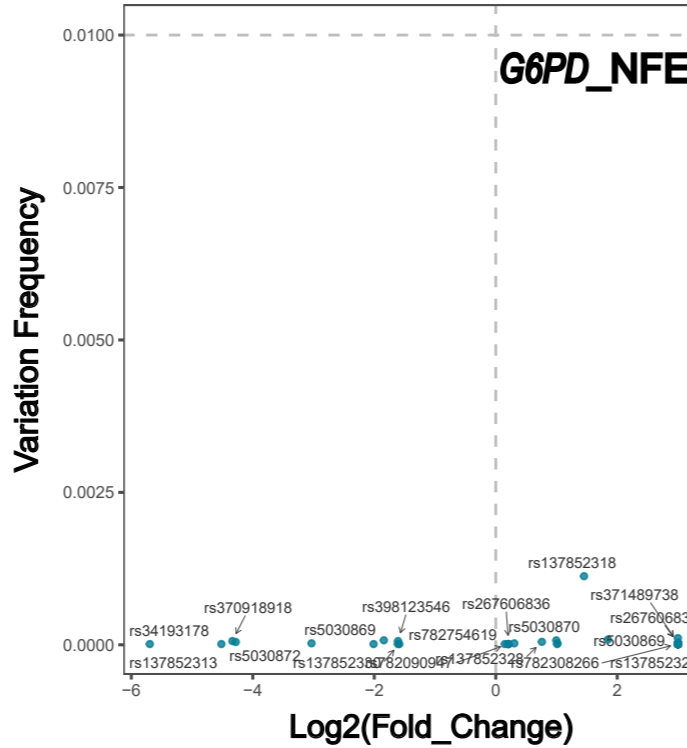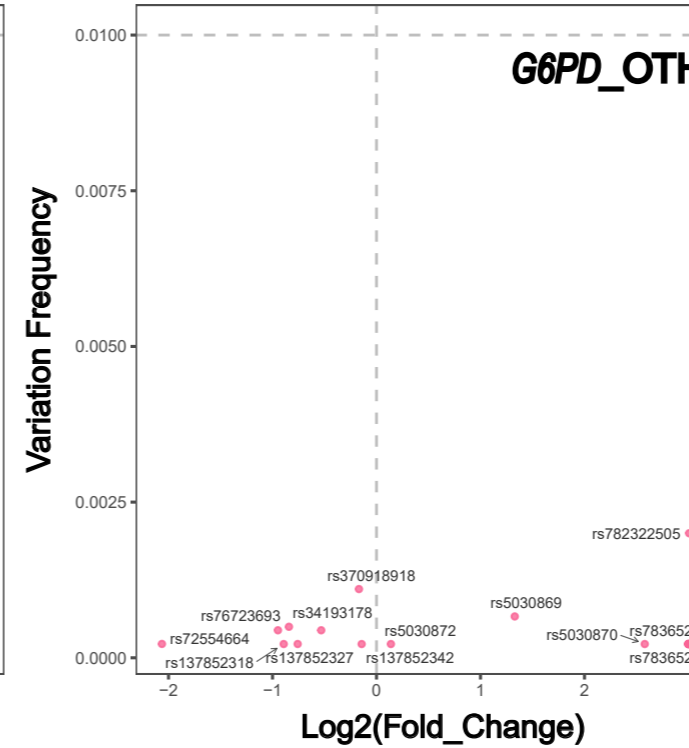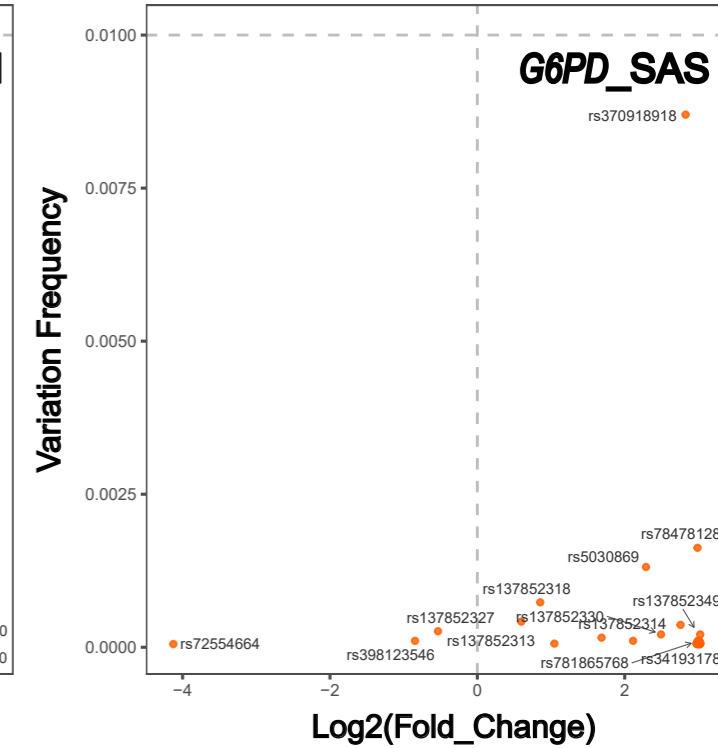

Supplement: 13167_2021_247_MOESM2_ESM.pdf [file 13167_2021_247_MOESM2_ESM.pdf]
